# Supplementary material for: Enhanced performance of a Mg 2 Si/Si heterojunction photodetector grown with the assistance of nanostructures
Source: Royal Society of Chemistry journal article supplement (doi:10.1039/d4tc04029e), 2024-11-11
Supplement: d4tc04029e1.pdf [file d4tc04029e1.pdf]

## **Enhanced performance of Mg<sub>2</sub>Si/Si heterojunction photodetector grown with the assistance of nanostructures**

**Hang Yu,<sup>a</sup> Jun Gou,<sup>\*abcd</sup> Yanshuai Zhang,<sup>a</sup> Xiutao Yang,<sup>a</sup> Gaoyun Zhang,<sup>a</sup> Lixin  
Liu,<sup>a</sup> He Yu,<sup>ab</sup> Zhiming Wu<sup>ab</sup> and Jun Wang<sup>ab</sup>**

### ***Supporting Information***

*a School of Optoelectronic Science and Engineering, University of Electronic Science and  
Technology of China, Chengdu 610054, China*

*b State Key Laboratory of Electronic Thin Films and Integrated Devices, University of Electronic  
Science and Technology of China, Chengdu 610054, China*

*c Key Laboratory of Science and Technology on Infrared Detector, Luoyang 471099, China*

*d Tianfu Jiangxi Laboratory, Chengdu 641419, China*

*\*Corresponding author : [goujun@uestc.edu.cn](mailto:goujun@uestc.edu.cn)*

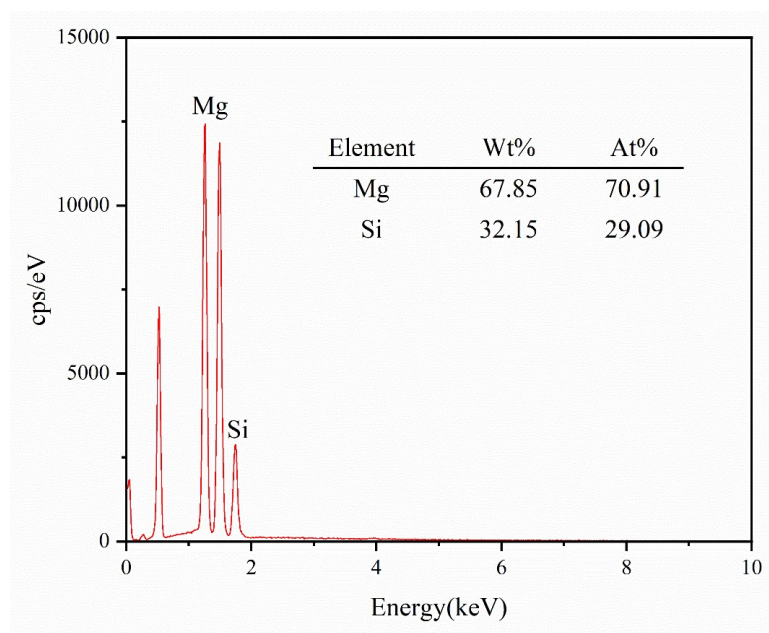

**Figure S1.** EDS elemental analysis of Mg<sub>2</sub>Si film.

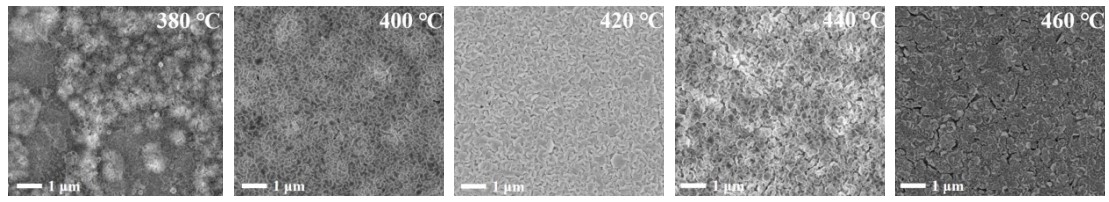

**Figure S2.** SEM images of Si-based Mg<sub>2</sub>Si thin films with different annealing temperatures.

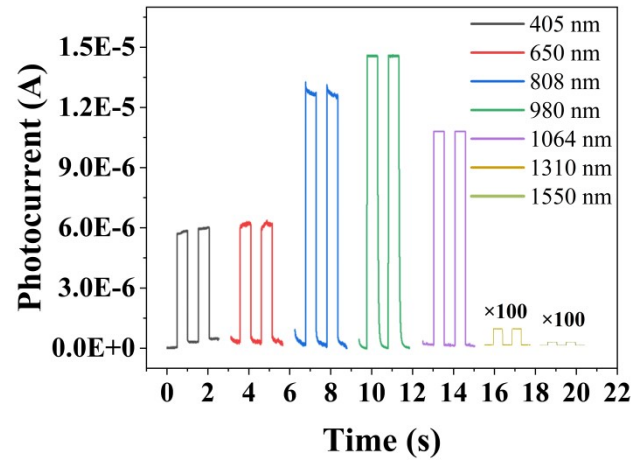

**Figure S3.** Optical response of Mg<sub>2</sub>Si/Si heterojunction photodetector at different wavelengths with an annealing temperature of 420 °C and an annealing time of 8 h.

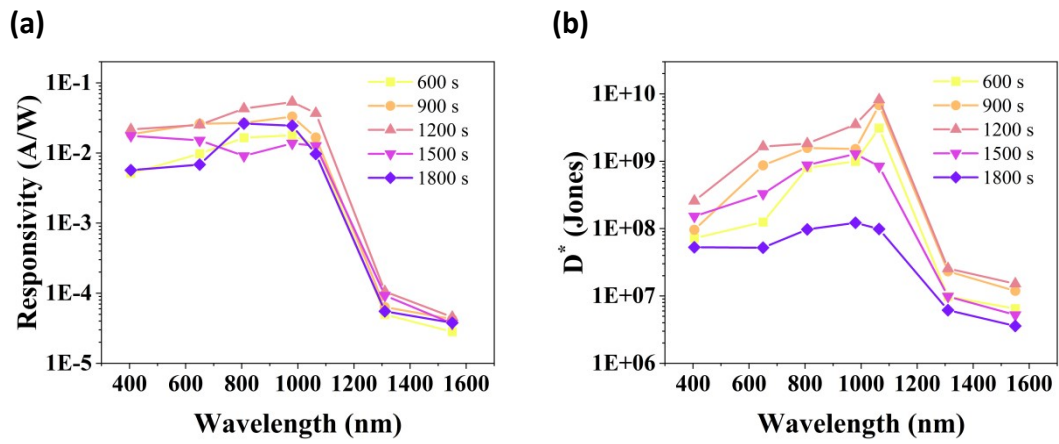

**Figure S4.** Performance of Mg<sub>2</sub>Si/Si heterojunction devices with different sputtering time of Mg films at -1 V bias. (a) Responsivity comparison; (b) Specific detectivity ( $D^*$ ) comparison.

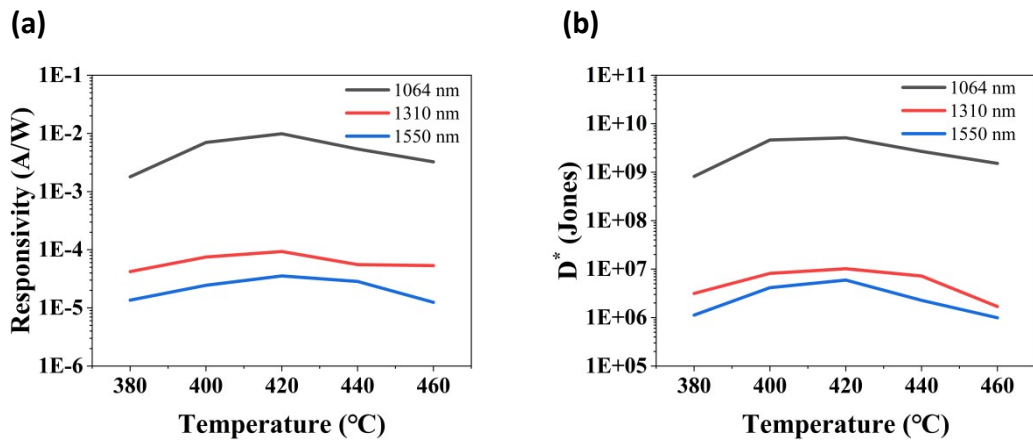

**Figure S5.** Performance of photoconductors based on Mg<sub>2</sub>Si films with different annealing temperatures at 1064 nm, 1310 nm and 1550 nm wavelengths. (a) Responsivity; (b) Specific detectivity ( $D^*$ ).

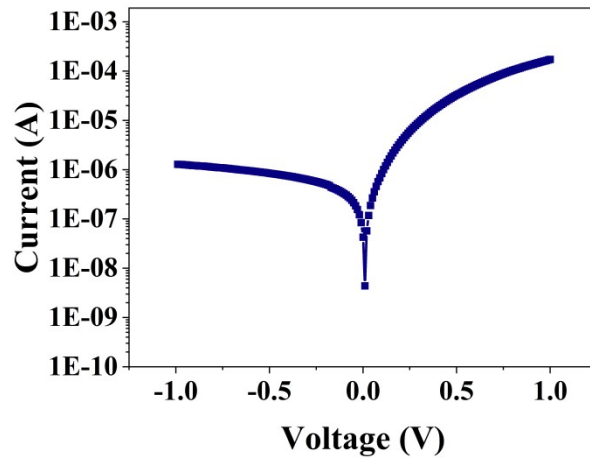

**Figure S6** I-V curve in dark of Mg<sub>2</sub>Si/Si heterojunction photodetector grown with the assistance of nanostructures.

**Table S1** Hall test results of Mg<sub>2</sub>Si film.

| Sample             | Temperature (K) | Type | Mobility<br>cm <sup>2</sup> /(V*s) | Carrier concentration<br>1/cm <sup>3</sup> |
|--------------------|-----------------|------|------------------------------------|--------------------------------------------|
| Mg <sub>2</sub> Si | 300             | P    | 4.15                               | 5.2E15                                     |



**Table S2** Performance comparison of our Mg<sub>2</sub>Si/Si heterojunction photodetector with other Mg<sub>2</sub>Si-based infrared photodetectors.

| Materials                                  | R<br>(mA/W) | Switching<br>Ratio | $\tau_r/\tau_f$ | D* (Jones)            | Wavelength<br>(nm) | Ref       |
|--------------------------------------------|-------------|--------------------|-----------------|-----------------------|--------------------|-----------|
| Mg <sub>2</sub> Si/Si                      | 1040        | 6250               | 2.74/1.34ms     | 8.98×10 <sup>11</sup> | 532-1550           | [1]       |
| Mg <sub>2</sub> Si/Si                      | 470         | /                  | 113/116μs       | /                     | 800-1350           | [2]       |
| p-Mg <sub>2</sub> Si/ n-Mg <sub>2</sub> Si | 1.4         | /                  | /               | /                     | 950-1800           | [3]       |
| MLG/Mg <sub>2</sub> Si/Si                  | 23.7        | 4086               | /               | 1.2×10 <sup>10</sup>  | 980-1180           | [4]       |
| Mg <sub>2</sub> Si/Si                      | 14.76       | 2341               | /               | 7.4×10 <sup>9</sup>   | 1000-1150          |           |
| Mg <sub>2</sub> Si/Si                      | 60          | 15740              | 1.72/1.61ms     | 8.51×10 <sup>9</sup>  | 405-1550           | This work |
| Mg <sub>2</sub> Si/Si-nano                 | 183         | 9780               | 1.68/0.87ms     | 9.43×10 <sup>9</sup>  | 405-1550           |           |

### References:

- [1] Zhu, Q.H.; Ye, P.; Tang, Y.M.; Zhu, X.D.; Cheng, Z.Y.; Xu, J.; Xu, M.S. High-performance broadband photoresponse of self-powered Mg<sub>2</sub>Si/Si photodetectors. *Nanotechnology* 2022, 33, 115202.
- [2] Elamir, A.; Ohsawa, T.; Ishii, S.; Imura, M.; Ohashi, N. Silicon-compatible Mg<sub>2</sub>Si/Si n-p photodiodes with high room temperature infrared responsivity *Mater. Sci. Semicond. Process.* 2019, 102, 104577.
- [3] Elamir, A.; Ohsawa, T.; Nabatame, T.; Ohi, A.; Ohashi, N. Ecofriendly Mg<sub>2</sub>Si-based photodiode for short-wavelength IR sensing *Mater. Sci. Semicond. Process.* 2019, 91 222–9.
- [4] Yu, H.; Deng, R.; Mo, Z.; Ji, S.; Xie, Q. Fabrication and Characterization of Visible to Near-Infrared Photodetector Based on Multilayer Graphene/Mg<sub>2</sub>Si/Si Heterojunction. *Nanomaterials* 2022, 12, 3230.
